# Supplementary material for: Breath Quality and Aspects of Motor Fitness are Key Indicators in Dance/Movement Therapy Assessment
Source: Research Square preprint supplement (doi:10.21203/rs.3.rs-7829291/v1), 2025-10-15
Supplement: Supplementary file 1 [file 0ba0c20bf7e72896602013fd.xlsx]

## Sheet: appendix
Participant	Work setting	Population	Reaction Time	Balance	Coordination	Accuracy	Agility	Spatial	Breath
1	DoD Medical Center	Active and transitioning to retirement Service members with TBI
2	Psychiatric
3	Other	Adolescents and adults	Based on the ability of my clients to move, the speed and reaction time is dependent on it. I would let the client express themselves using their body to their ability.
4	Other	children/families	These are inherent outcomes of the work but not necessarily the goal of a session.	Inherent in the work but not the goal of the client - just the parallel process of psychological state	Same as previous statements
5	Other	Adults with Autism	My goals with this area are on a spectrum which rakes into account both function use and personal preference. I want my clients to be able to access skills that they need but also to choose how they use their movements to express themselves.	Movement is both functional and expressive, and balance of groundedness both have emotional and physical causes. All of these effect my clients, and it is different for every one.	This area also speaks to the tension between personal choice/expression and how movement can affect how others see us. I want my clients to have the choice to move as they need to so that others’ perceptions can be cued to what they expect to see (or not) and so that my clients have as a full a range of movements as they choose to use.	All of these either allow my clients to fit in better to typical social expectations or not. I want them to have the choice to engage in their own more innate movement patterns or to take on movement patterns which will offer them greater acceptance.	Agility is an area that usually affects functionality more so than social acceptance, although a part of this does affect social acceptance, so this is of greater importance than many of the other categories.	I find that these areas a less functionally necessary so if I was seeking improvement it would be for the clients’ personal preference.	Breath control can have an impact on movement and functioning, but I find for this population just the ability engage in meaningful deep breathing (ones that regulate both body and brain) is of the greatest importance.
6	Other Medical Center	adult oncology	fatigue is a major side effect for many of patients helping them overcome it with fluctuations in movement is a key component	balance issues due to neuropathy are significant	coordination of self is important to reintegrate into the body - this is used in couple's work as well	important but not the main focus	important but not the main focus of our work due to tx side effects and movement limitations	most patients stay in a small movement space due to balance issues	breathing is used the most as an intervention for connection and regulation
7	Other	adults (individual and group)	so many of my clients want to access changes quickly, but get frozen. many times we focus on slowing down to access and then acceleration
8	Other Medical Center,Rehabilitation,Counseling Center,Crisis Center	Primarily 0 to 19
9	Other	Children, parents/caregivers, adult individuals	I meet my clients where they are at. So my expectations of what kind of movement or how they should be moving is not something I consider to be important or even appropriate. If someone wants to move slowly or not at all, that is perfectly fine. And if someone wants to express on a larger scale with bigger movements, I welcome that as well. Part of my hope as a therapist/clinician is that the cli…	Helping a client bring awareness to their moving bodies is important. A client may not realize when they get anxious, that they sit rigid and tight. Helping them become aware of this maladaptive posture could offer more freedom in movement, more relaxation in the muscles especially when anxious or stressful moments arise.	Being present and bringing awareness to what's going on internally for a client, and expanding outward into physical movement are important to greater insight, self-understanding, and playfulness.	Empathy and reciprocity are big cornerstones, I think, in DMT work: Connecting one moving self to another moving self and developing better understanding; confidence; sense of community.	In my private practice, I don't have an agenda or expectations for how my clients move. With the exception of work with kids, redirecting their movements for safety purposes is what I consider for "ability to start and stop movement quickly" and "ability to more easily change direction while moving".	Dynamic use of the space and shaping in planes could bring about useful insight for the client and how they go about their lives.	Breathing is everything! It is also I think the most accessible and easy-to-understand movement skill especially if clients are not used to working with a DMT. Breathwork counts as movement and accessing our breath is so crucial for when we are faced with difficult situations, traumatic memories, hard conversations, etc. Being able to take deep breaths or tuning into when we are not breathing as …
10	Nursing home	Adult and elderly	No	no
11	Other	High functioning adults	I tend to focus more on how to help my clients learn ways to decelerate because they usually have no problem with acceleration.		With my clients, we do not tend to use music or dance; I tend to rely on the typical everyday movements or gestures as interventions.	Again, my work is with the pedestrian, everyday movements.
12	School,Psychiatric,Rehabilitation,Counseling Center	Children, parents, psychiatric patients and caregivers, students, teachers, couples, intellectual disabilities, elderlies		Grounding	Organization
13	Psychiatric	adults
14	Other	elderly	It seems to me that when people are engaged & motivated it tends to improve their reaction time		I have not worked specifically with coordination in DMT
15	Other	Children	To me, this all relates to an individual's ability to find greater range of possibility through the body, and in the present moment -- not to mention joy through both.	Similarly, this all relates to functional, ADL movements -- that's key here, as especially with advancing age.	Coming to mind here is the ability to find ease and integration in the body, also in relation to outer stimuli -- key for dance/movement being part of a full, joyful, and healthful life.	In general, this feels more pertinent to performative dance than to DMT -- yet could be key considerations, and useful to playfully challenge, with support and care, with certain populations (such as neurological disorders and those in memory care).	At first blush, this also might seem to apply more to performative dance and/or athletics -- yet could also be key in functional/ADL movement.	Perhaps the last in this list the least of the three, but to me this goes back to a greater range of possibility in movement, in the body, and in the present moment.	All of this directly correlates with holistic health, in my view!
16	Counseling Center	adults
17	Counseling Center	children, adolescents, adults, elderly	it is important, especially for clients with a history of trauma: reaction time adapted to experience	brain (body) half connection training	so important	accuracy can be misunderstood as perfectionism		boundaries, safe place, bullying, cyber-boundaries,...	everything is connected with the breath, very important
18	Counseling Center	children, adolescents, adults
19	Other	Pre K - 12 via Telehealth
20	Other	LGBTQ+, trans and gnc, adults who have experienced complex trauma in childhood, late-diagnosed autism	I don’t utilize this metric as a basis for any interventions	I utilize plays with balance in a much more metaphorical way for emotional processing as opposed to thinking of balance as a skill to be mastered	Focus on this realm is on one’s ability to express oneself physically, not to meet some exterior standard of coordination		This is more about increasing a patient’s comfort with moving their body in different ways, again not to meet an outside standard of agility.	The room size/available space definitely plays into how people move in a space. The idea of “taking up space” is something played with in movement to work on patient’s assertiveness and confidence	Useful as a regulating and grounding tool
21	Counseling Center	Native American Population, including substance abuse and SMI.
22	Other	Jail inmates, Indigenous community
23	Other Medical Center	Pediatrics
24	Other	Adults	Playfulness is more a function of dynamic use of time than acceleration alone	More important with certain populations, especially elderly and those with side effects of chemotherapy	Unclear how tension flow attributes relate to coordination versus expressivity			What about use of diagonals?
25	Psychiatric,Nursing home,Counseling Center	Children, adults, older adults
26	VA Medical Center	Veterans (extended care/ geriatric/ memory care/ hospice), behavioal health (inpt, otpt, residential), substance use, homeless/vocational rehab, perinatal care/reproductive care		Not at the moment-- If I have any additional comments following the conclusion of the survey, I will send them to Dr. Bell.	Not at the moment-- If I have any additional comments following the conclusion of the survey, I will send them to Dr. Bell.	Not at the moment-- If I have any additional comments following the conclusion of the survey, I will send them to Dr. Bell.	Not at the moment-- If I have any additional comments following the conclusion of the survey, I will send them to Dr. Bell.	Not at the moment-- If I have any additional comments following the conclusion of the survey, I will send them to Dr. Bell.	I find breathing to be very connected to the work in behavioral health and the introception/neuroception that is often a focus of the work to enhance a greater understanding of intrapersonal experience and how that impacts one's ability to engage with the world one interacts with.
27	VA Medical Center	Dementia, Nursing Home, PTSD, Military Sexual Trauma, Homeless veterans, Geriatric psych, acute psych
28	VA Medical Center	Veterans, Active Duty, TBI, PTSD, Chronic pain, Migraines, post amputation		balance and agility - ability to shift and change directions may be important here as well with spatial awareness	coordination to me does not have to be measured in "rhythm" with music, it can also be measured in walking making sure UE and LE are cross lateral synchronized movements	working in a rehabilitation center movement accuracy as a measuring tool for improvement would be phenomenal		I use planes of motion - Horizontal, Vertical, Sagittal as part of my initial assessments
29	VA Medical Center	PTSD, SUD
30	VA Medical Center	Mental Health and Substance Use	important for PTSD patients			important for depression and prevent isolation and provide empathic connection
31	DoD Medical Center	TBI PTSD
32	Psychiatric	Acute adult inpatient psychiatric patients in a public hospital	These are all main goals in my groups, especially a warm up. Although, if a patient shows no improvement, they group continues.	These goal are even slightly more important due to safety and fall risks	These are goals for the DMT session. I modify my interventions depending on the patient's ability	for the IP psych pop, these are the ultimate goals.	many patients lack agility and I do more assessing of agility than trying to improve it due to safety concerns		This is worked on in most every group
33	DoD Medical Center	Active duty service members with diagnosable TBI	For a hypervigilant service member who is commonly in high sympathetic tones, the ability to down-regulate (deceleration) is one of our focus points that demonstrates improved health. Additionally, the ability to quickly respond to playfulness and joyful movement is a critical skill for family dynamics.	Due to the high rate of muscoskeletal injury in this population, the range of motion and mobility is not as important as developing interoception for new ways to move to accommodate injury, managing pain, and approaching body movement with grace.	Synchrony with partner (other bodies) is a key component to a service member's healing program as their ability to attune to others and be sensitive to other bodies supports cohesion at work and more importantly on the home front.	*for previous question - movement sequencing is important for our cognitive support at the facility. Stated in previous question - the kinesthetic reciprocity is one of the most important skills developed/honed in our program.	Dynamic range = not so much range of motion, but the openness and fluidity to try many kinds of movement repertoire and branch out beyond the normal/engrained patterns.	Service members generally have 1 plane they like to move. Challenging these norms challenges cognitive and emotional structures creating space for new learning and expression. There are also preconceived notions of using space in the military environment. Finding safety in external and internal spaces is important.	Breathwork is an accessible skill the service members can utilize quickly, effectively, and safely.
